# Supplementary material
Source: PubMed Central journal article supplement (PMC5244304)
Supplement: AEM.02589-16_zam999117646s1.pdf [file AEM.02589-16_zam999117646s1.pdf]

## Supplementary Figure Legends

**Figure S1.** Expanded phylogenetic tree based on 16S ribosomal RNA gene sequences from 94 *Francisella* representatives.

**Figure S2.** Expanded phylogenetic tree based on *sdhA* gene sequences from 92 *Francisella* representatives.

**Figure S3.** Expanded phylogenetic tree based on 36 protein markers listed in Supplementary Table 1.

**Figure S4.** Four patterns of gene organization in the *Francisella* Pathogenicity Island (FPI). Pattern 1 is typical of *F. tularensis* subsp. *tularensis* and *F. novicida*. Pattern 2 is found in *F. tularensis* subsp. *holarctica*. Pattern 3 is found in a wide variety of isolates, including *F. philomiragia*, *F. noatunensis*, some *F. novicida*, *F. endociliophora*, and three of the new species (TX07-7310, MA06-7296 and CA97-1460). Pattern 4 is like Pattern 3, but has a truncated *iglG* gene and a small ORF on the complementary strand. Among the genomes that we analyzed, only TX07-7308 and *F. noatunensis* subsp. *orientalis* Toba04 had Pattern 4.

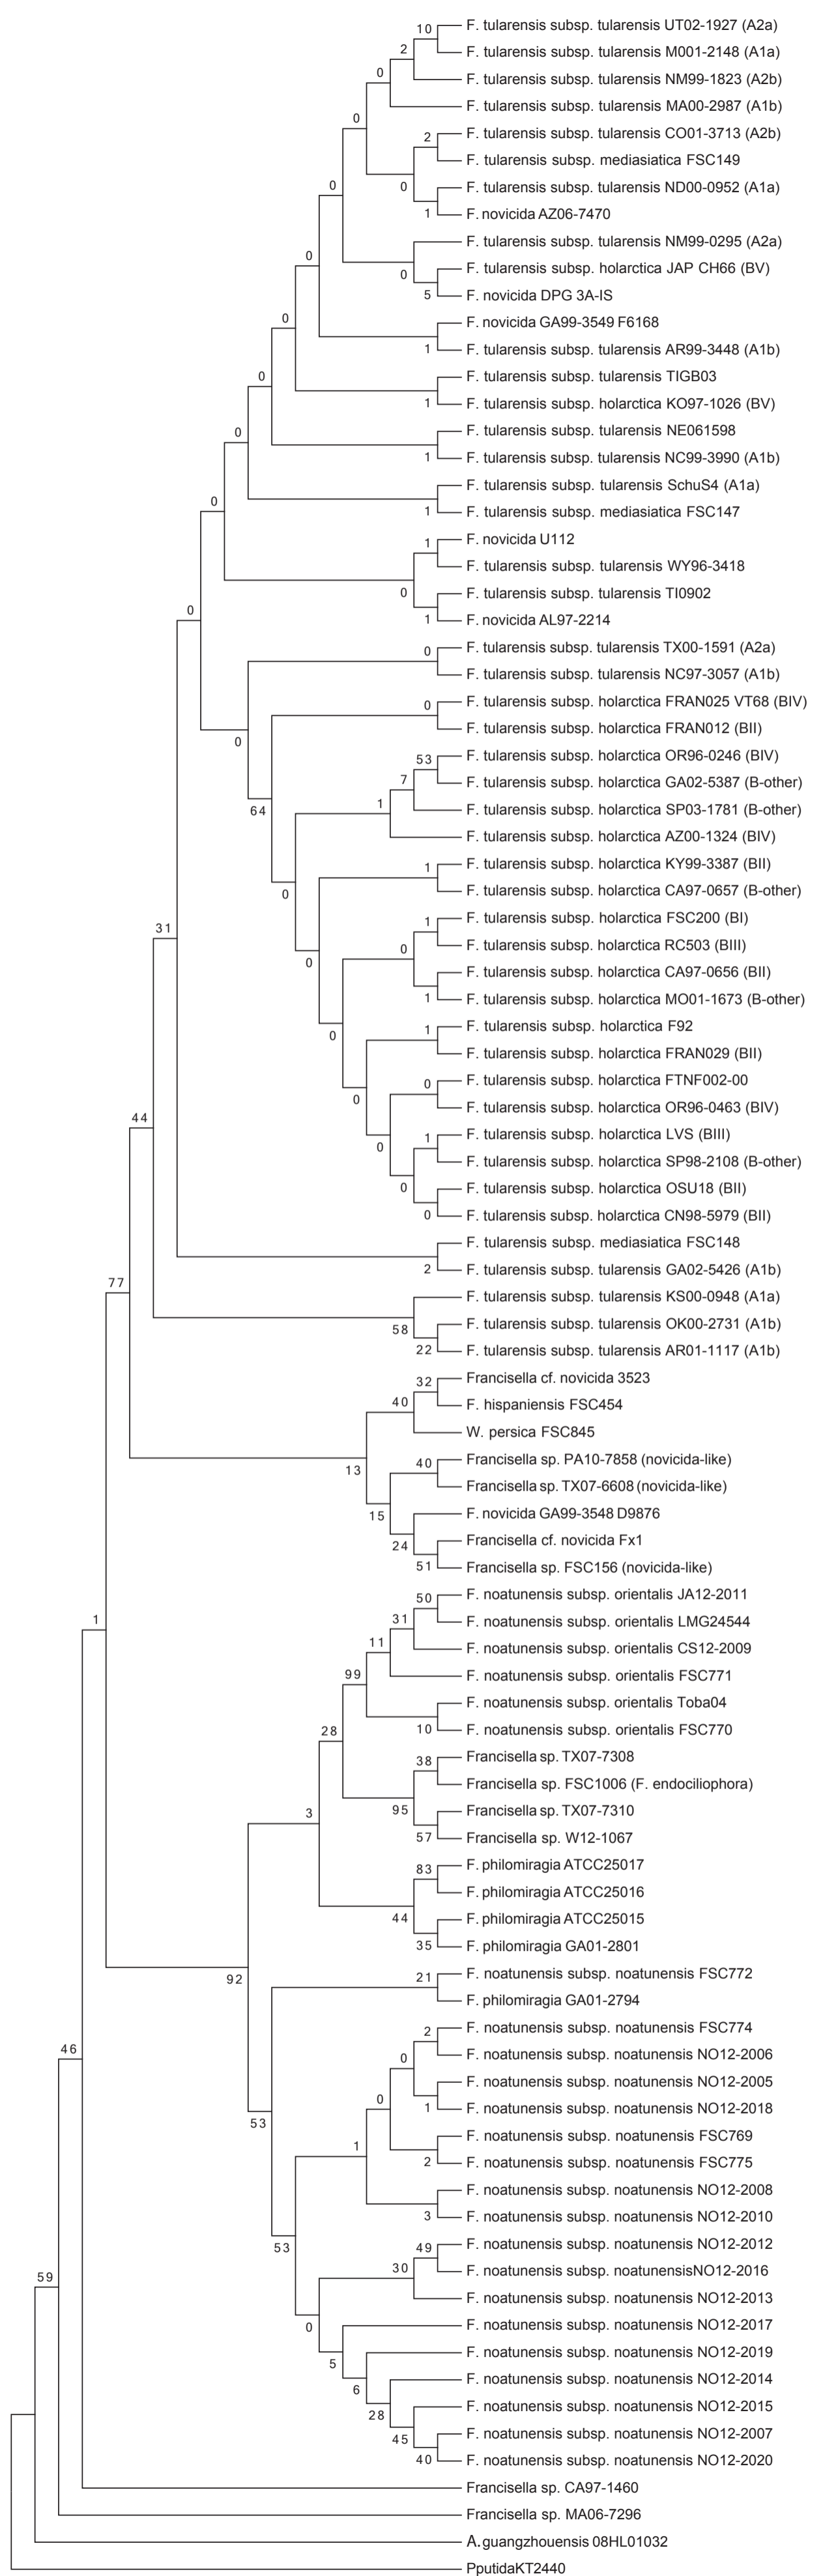

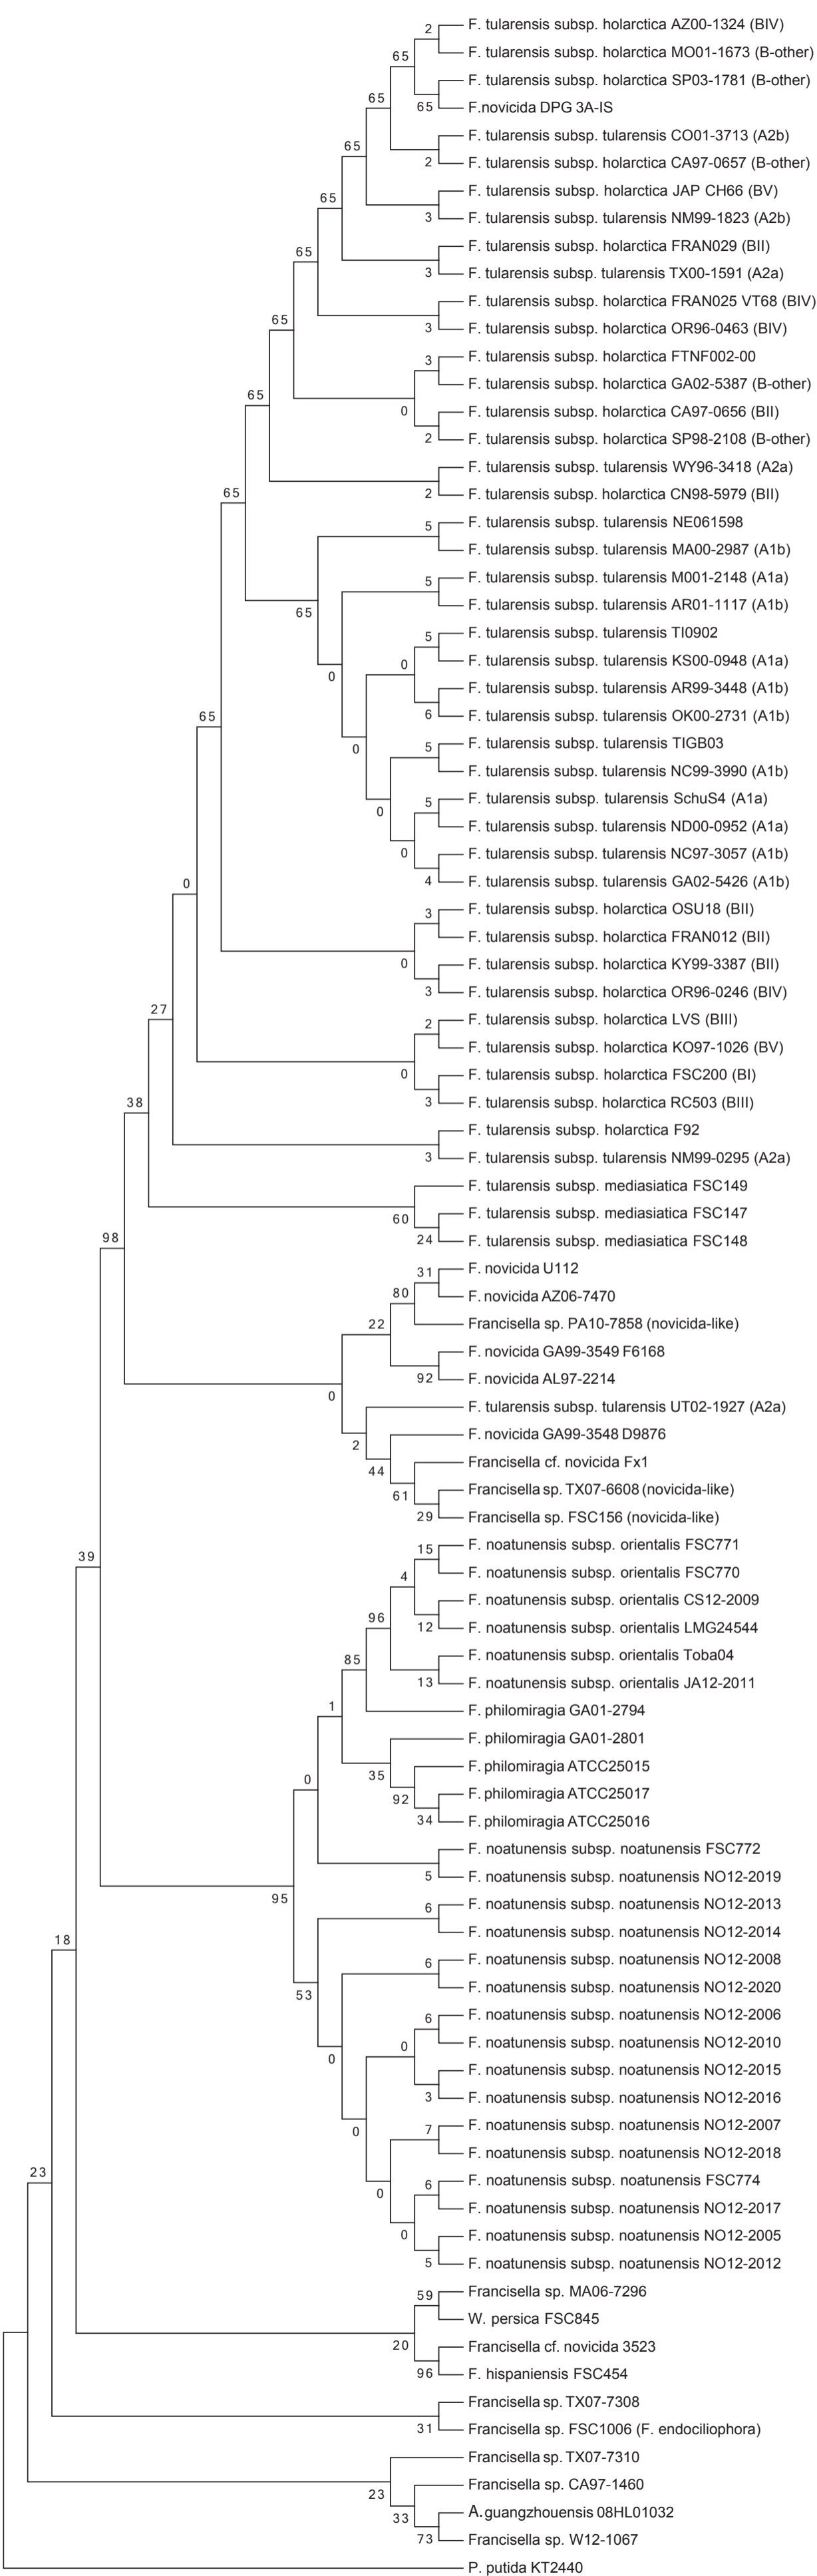



*F. tularensis* subsp. *tularensis* Schu S4  
FTT\_1344 - FTT\_1361c

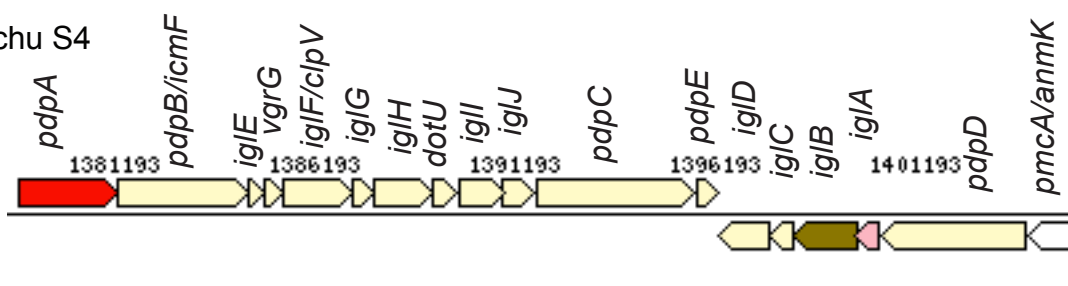

**Pattern 1**  
*pmcA* is pseudogene  
but not in all genomes

*F. tularensis* subsp. *holarctica* LVS  
FTL\_0126 - FTL\_0107

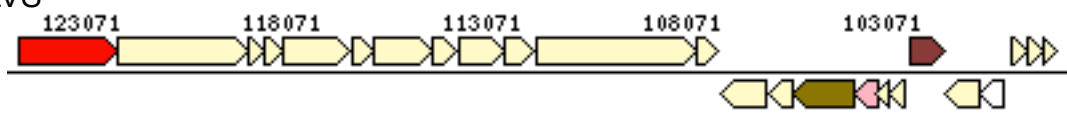

**Pattern 2**  
missing *pmcA*  
*pdpD* is small

*F. philomiragia* ATCC 25017  
Fphi\_1377 - Fphi\_1359

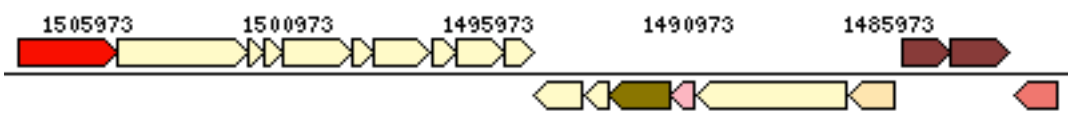

**Pattern 3**  
missing *pdpC*, *pdpE*  
flanking regions differ

*F. noatunensis* subsp. *noatunensis*  
representative FPI region

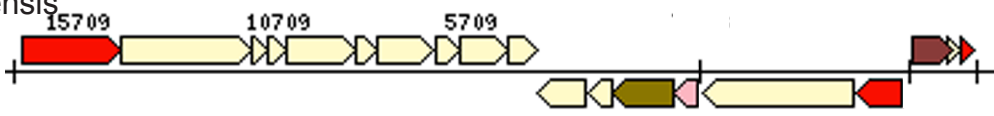

*Francisella* sp. TX07-7308  
F7308\_1016 - F7308\_0997

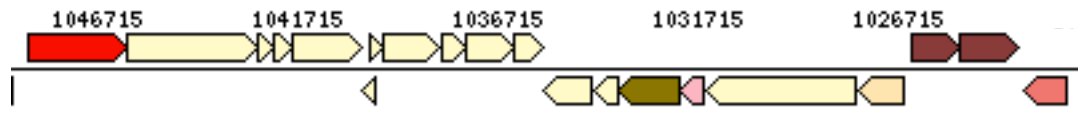

**Pattern 4**  
missing *pdpC*, *pdpE*  
*iglG* is truncated  
small ORF in reverse  
flanking regions differ

*F. noatunensis* subsp. *orientalis* Toba04  
OOM\_0944- OOM\_0925

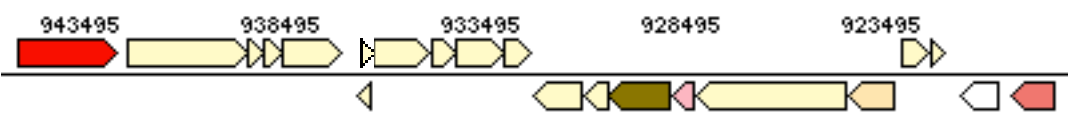

**Supplementary Table 1. Thirty-six phylogenetic marker genes**

| Gene                                                          | Function                                            |
|---------------------------------------------------------------|-----------------------------------------------------|
| DNA primase ( <i>dnaG</i> )                                   | initiation of DNA synthesis                         |
| ribosome recycling factor ( <i>frr</i> )                      | recycling ribosomes                                 |
| translation initiation factor IF-3 ( <i>infC</i> )            | initiation of protein synthesis                     |
| transcription elongation factor ( <i>nusA</i> )               | formation of stable elongation complexes            |
| phosphoglycerate kinase ( <i>pgk</i> )                        | glycolysis/gluconeogenesis                          |
| CTP synthetase ( <i>pyrG</i> )                                | pyrimidine biosynthesis                             |
| 50S ribosomal protein L1 ( <i>rplA</i> )                      | 50S ribosome structure                              |
| 50S ribosomal protein L2 ( <i>rplB</i> )                      | 50S ribosome structure                              |
| 50S ribosomal protein L3 ( <i>rplC</i> )                      | 50S ribosome structure                              |
| 50S ribosomal protein L4 ( <i>rplD</i> )                      | 50S ribosome structure                              |
| 50S ribosomal protein L5 ( <i>rplE</i> )                      | 50S ribosome structure                              |
| 50S ribosomal protein L6 ( <i>rplF</i> )                      | 50S ribosome structure                              |
| 50S ribosomal protein L11 ( <i>rplK</i> )                     | 50S ribosome structure                              |
| 50S ribosomal protein L7/L12 ( <i>rplL</i> )                  | 50S ribosome structure                              |
| 50S ribosomal protein L14 ( <i>rplN</i> )                     | 50S ribosome structure                              |
| 50S ribosomal protein L16 ( <i>rplP</i> )                     | 50S ribosome structure                              |
| 50S ribosomal protein L19 ( <i>rplS</i> )                     | 50S ribosome structure                              |
| 50S ribosomal protein L20 ( <i>rplT</i> )                     | 50S ribosome structure                              |
| 50S ribosomal protein L27 ( <i>rpmA</i> )                     | 50S ribosome structure                              |
| DNA-directed RNA polymerase subunit beta ( <i>rpoB</i> )      | RNA synthesis                                       |
| 30S ribosomal protein S2 ( <i>rpsB</i> )                      | 30S ribosome structure                              |
| 30S ribosomal protein S3, partial ( <i>rpsC</i> )             | 30S ribosome structure                              |
| 30S ribosomal protein S5 ( <i>rpsE</i> )                      | 30S ribosome structure                              |
| 30S ribosomal protein S9 ( <i>rpsI</i> )                      | 30S ribosome structure                              |
| 30S ribosomal protein S10 ( <i>rpsJ</i> )                     | 30S ribosome structure                              |
| 30S ribosomal protein S11 ( <i>rpsK</i> )                     | 30S ribosome structure                              |
| 30S ribosomal protein S13 ( <i>rpsM</i> )                     | 30S ribosome structure                              |
| 30S ribosomal protein S19 ( <i>rpsS</i> )                     | 30S ribosome structure                              |
| SsrA-binding protein ( <i>smpB</i> )                          | rescuing stalled ribosomes                          |
| elongation factor Ts ( <i>tsf</i> )                           | translation                                         |
| ATP synthase FOF1 subunit alpha ( <i>atpA</i> )               | ATP synthesis                                       |
| DNA topoisomerase IV subunit A ( <i>parC</i> )                | regulate DNA topology and structure                 |
| phosphoglucomutase ( <i>pgm</i> )                             | glycogenesis/glycogenolysis                         |
| succinate dehydrogenase, flavoprotein subunit ( <i>sdhA</i> ) | TCA cycle                                           |
| triosephosphate isomerase ( <i>tpiA</i> )                     | glycolysis                                          |
| anthranilate synthase component I ( <i>trpE</i> )             | Phenylalanine, tyrosine and tryptophan biosynthesis |

Thirty-one of these are phylogenetic markers from the AMPHORA (1) database (*dnaG*, *frr*, *infC*, *nusA*, *pgk*, *pyrG*, *rplA*, *rplB*, *rplC*, *rplD*, *rplE*, *rplF*, *rplK*, *rplL*, *rplM*, *rplN*, *rplP*, *rplS*, *rplT*, *rpmA*, *rpoB*, *rpsB*, *rpsC*, *rpsE*, *rpsI*, *rpsJ*, *rpsK*, *rpsM*, *rpsS*, *smpB*, and *tsf*). The additional five markers (*atpA*, *parC*, *pgm*, *sdhA*, and *trpE*) have been used to resolve relationships between *F. novicida* and *F. tularensis* strains (2, 3).

(1) Wu M, Eisen JA. 2008. A simple, fast, and accurate method of phylogenomic inference. *Genome Biol.* 9:R151.

(2) Brett M, Doppalapudi A, Respicio-Kingry LB, Myers D, Husband B, Pollard K, Mead P, Petersen JM, Whitener CJ. 2012. *Francisella novicida* Bacteremia after a Near-Drowning Accident. *J Clin Microbiol* 50:2826-2829.

(3) Berrada ZL, Goethert HK, Telford SR. 2008. Isolation of *Francisella tularensis tularensis* subpopulation Ai from Missouri lone star ticks. *Am J Trop Med Hyg* 79:230-230.
